# Supplementary material for: Upregulated Serum Granulysin Levels in Women With Antiphospholipid Syndrome-Associated Recurrent Miscarriages Are Downregulated by Heparin Treatment
Source: Research Square preprint supplement (doi:10.21203/rs.3.rs-622771/v1), 2021-07-09
Supplement: Supplementary file 1 [file be9d0ef2d68b963731f8ec65.pdf]

## Supplementary Information

**Article title:**

Upregulated serum granulysin levels in women with antiphospholipid syndrome-associated recurrent miscarriages are downregulated by heparin treatment

**Journal name:**

*BMC Pregnancy and Childbirth*

**Author names:**

Tomoko Ichikawa, M.D., Ph.D. prima@nms.ac.jp

Yasuyuki Negishi, M.D., Ph.D. negi@nms.ac.jp

Sayuri Kasano, M.D. kondo-s@nms.ac.jp

Ryoko Yokote, M.D. ma-ko5085@nms.ac.jp

Mirei Yonezawa, M.D. mirei-0806@nms.ac.jp

Nozomi Ouchi, M.D., Ph.D. nozomi-0102-@nms.ac.jp

Yoshimitsu Kuwabara, M.D., Ph.D. kuwa@nms.ac.jp

Toshiyuki Takeshita, M.D., Ph.D. toshimac@nms.ac.jp

**Correspondence author:** Yasuyuki Negishi

**Affiliation:** Department of Microbiology and Immunology, Nippon Medical School, 1-1-5 Sendagi Bunkyo-ku, Tokyo, 113-8602, Japan

**E-mail:** negi@nms.ac.jp

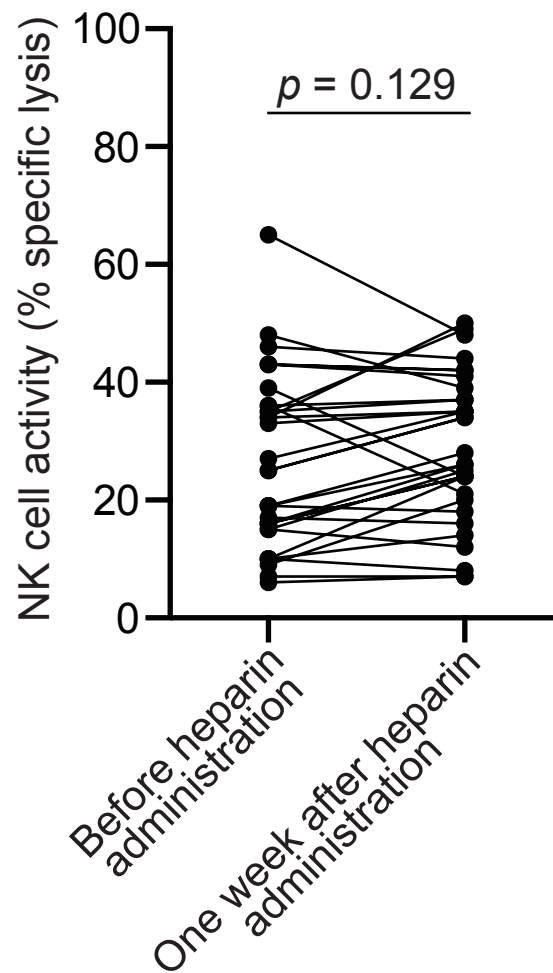

Supplementary Information 1. Changes of NK cell activity in peripheral blood for the patients treated with combination therapy of aspirin and heparin (n = 32). The left plots show the values before heparin administration, and the right plots show the values one week after heparin administration. Peripheral blood mononuclear cells were isolated and incubated with  $^{51}\text{Cr}$ -labeled K562 target cells at an E/T ratio of 20:1. Percent specific lysis was calculated. Paired t-test

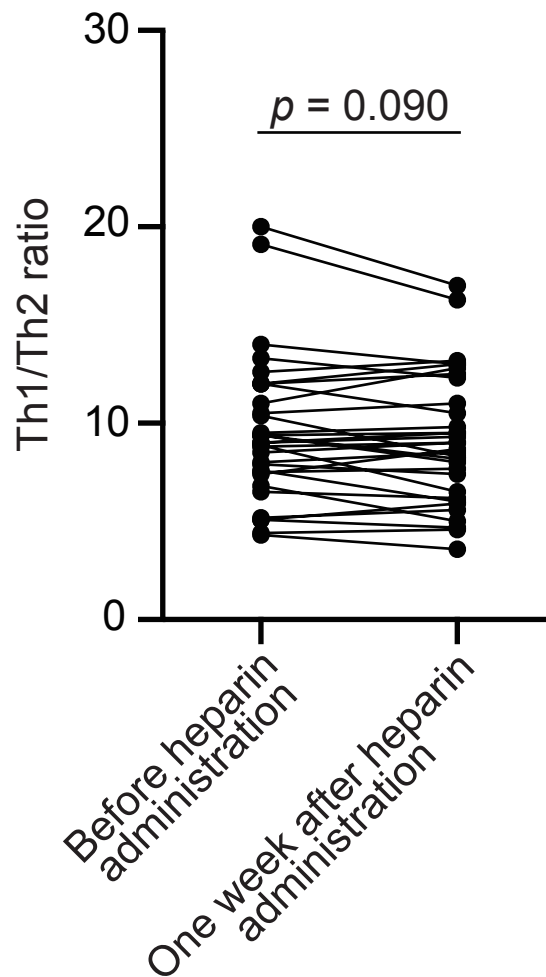

Supplementary Information 2. Changes of Th1/Th2 ratio in peripheral blood for the patients treated with combination therapy of aspirin and heparin ( $n = 32$ ). The left plots show the values before heparin administration, and the right plots show the values one week after heparin administration. Peripheral blood mononuclear cells were isolated and stimulated with PMA; CD4<sup>+</sup> IFN- $\gamma$ <sup>+</sup> IL-4<sup>-</sup> cells were identified as Th1 cells, whereas CD4<sup>+</sup> IFN- $\gamma$ <sup>-</sup> IL-4<sup>+</sup> cells were identified as Th2 cells. The Th1/Th2 cell ratios were calculated. Paired t-test
